# Supplementary material for: Size Distribution, Elemental Composition and Morphology of Nanoparticles Separated from Respirable Coal Mine Dust
Source: MDPI journal article supplement (doi:10.3390/min13010097), 2023-01-07
Supplement: s1 [file s1]

Archive with 1 entries (1 files):
- minerals-2137884-supplementary.pdf
